# Supplementary material
Source: Research Square preprint supplement (doi:10.21203/rs.3.rs-7590228/v1)
Supplement: Supplementary file 1 [file 013111a314a6a824c4406745.pdf]

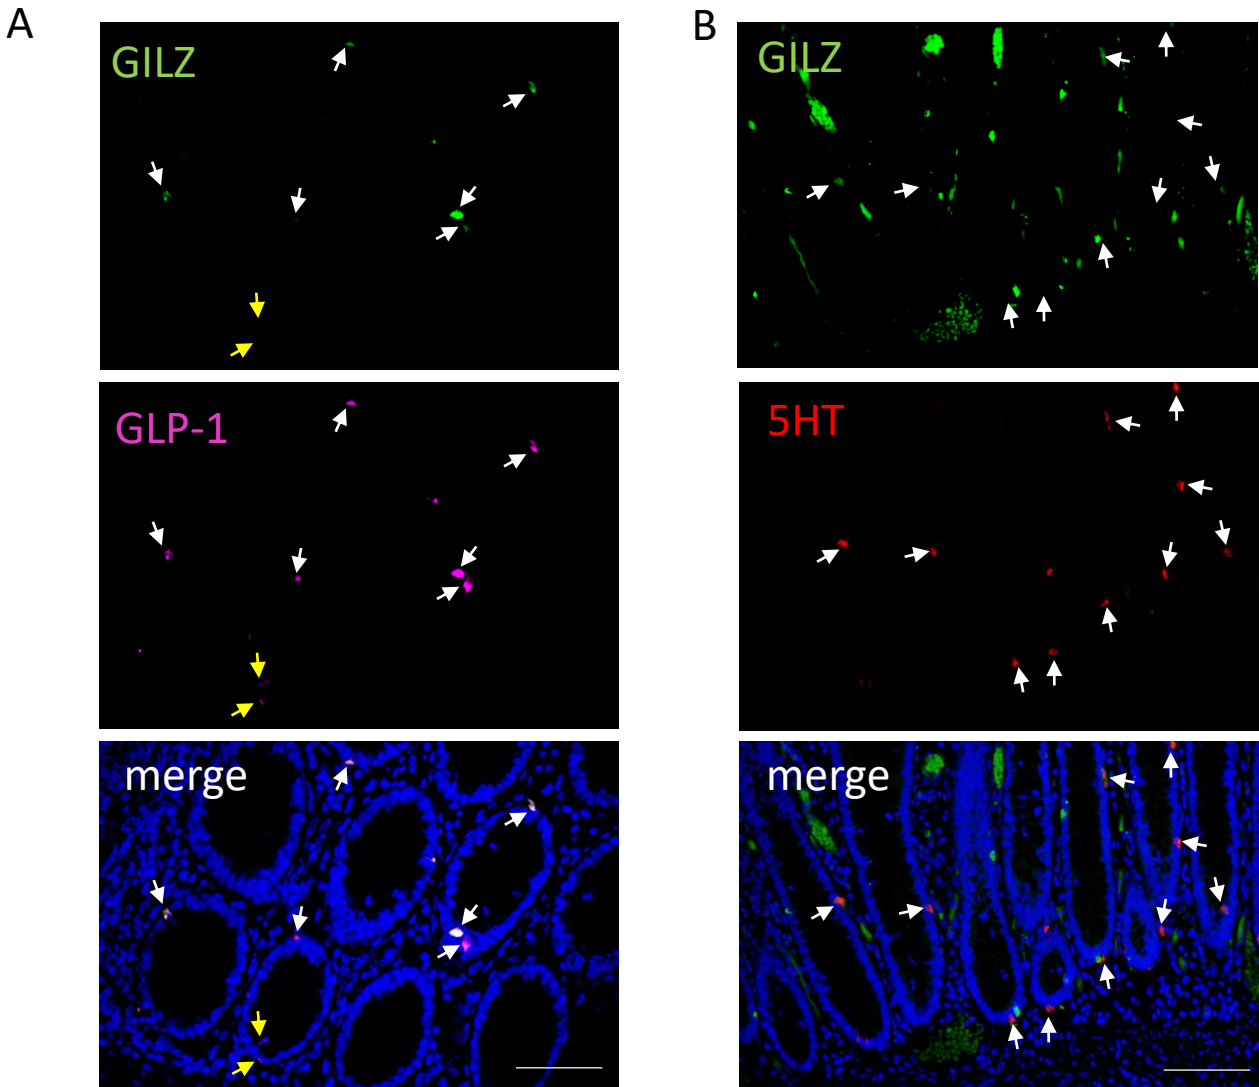

**Supplementary Figure 8:** confocal images of healthy colon sections. A. Immunofluorescence of a stained colon with anti-GILZ (green) and anti-GLP-1 (pink) Abs. Yellow arrows point at GILZ<sup>-</sup>/GLP-1<sup>+</sup> cells, whereas white arrows indicate GILZ<sup>+</sup>/GLP-1<sup>+</sup> cells. B. Immunofluorescence of a stained colon with anti-GILZ (green) and anti-5HT (red) Abs. Arrows point at 5HT<sup>+</sup>/GILZ<sup>+</sup> cells. Nuclei were stained with DAPI. Scale bars: 100µm.
