# Supplementary material
Source: Research Square preprint supplement (doi:10.21203/rs.3.rs-7590228/v1)
Supplement: Supplementary file 2 [file 15a809de02bf3e3808d13998.pdf]

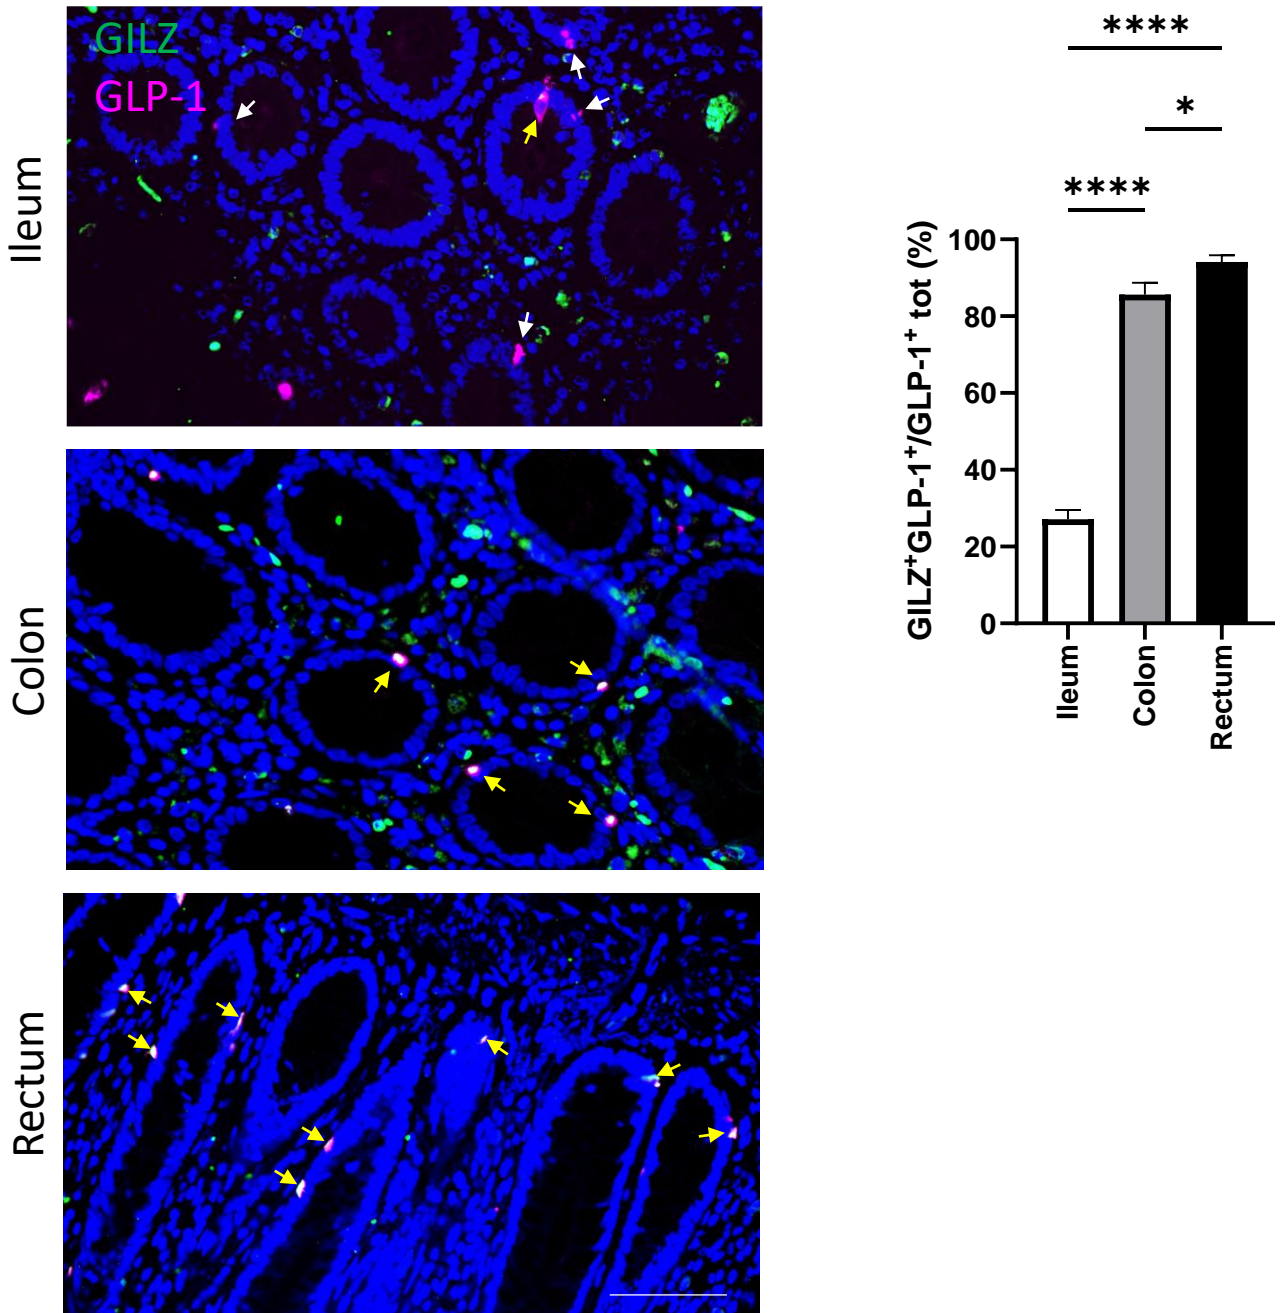

**Supplementary Figure 5.** Representative confocal images of ileal, colonic and rectal sections from healthy individuals. Sections were double stained with the indicated Abs. Cells were counted in 11, 20, and 12 HPFs in ileum ( $n=5$ ), colon ( $n=7$ ), and rectum ( $n=5$ ) sections, respectively. The percentages of GILZ<sup>+</sup>/GLP-1<sup>+</sup> cells are reported in the graph. Scale bar: 100 $\mu$ m. \*  $p<0.05$ , \*\*\*\*  $p<0.0001$
