# Supplementary material
Source: Research Square preprint supplement (doi:10.21203/rs.3.rs-7590228/v1)
Supplement: Supplementary file 3 [file 340b30f665dc08e6d9de7d1a.pdf]

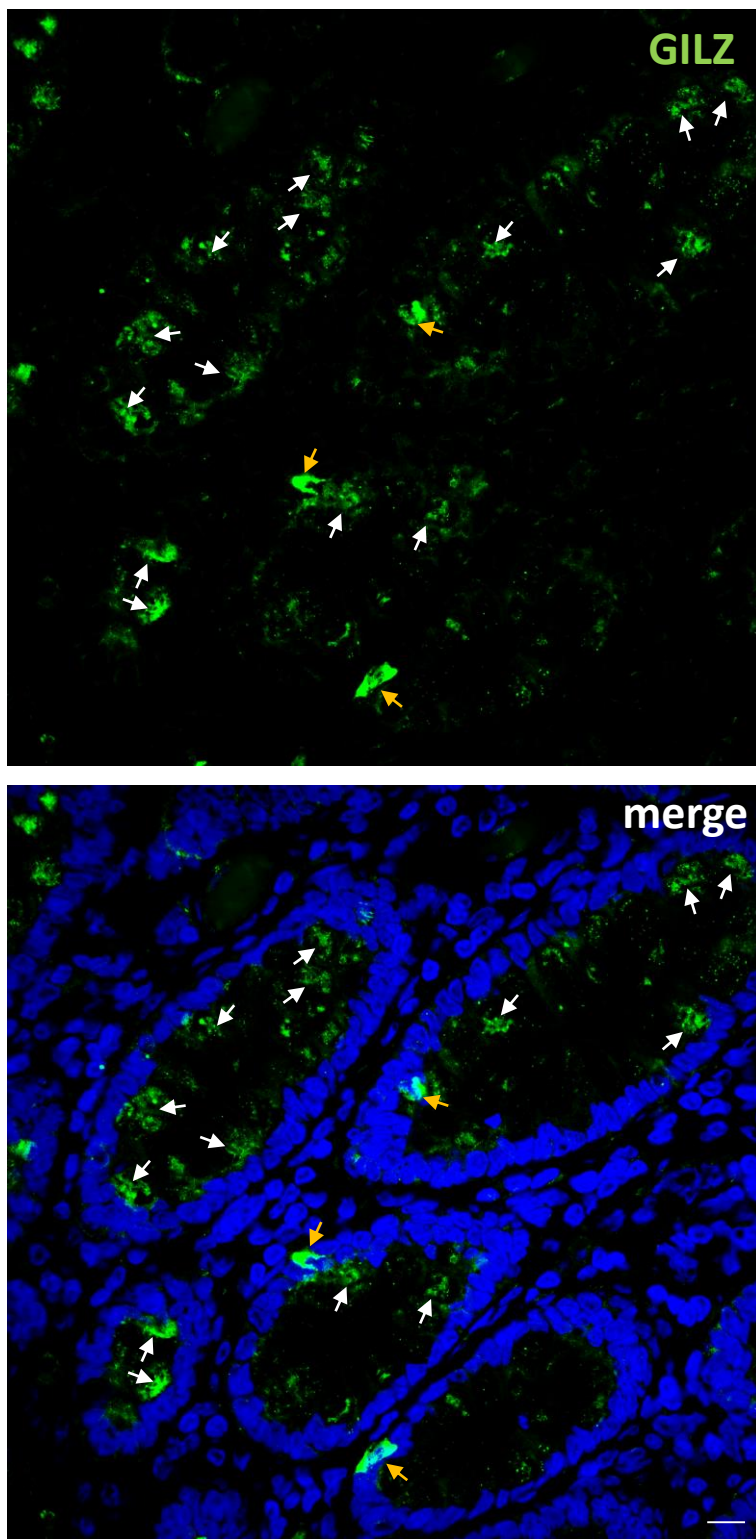

**Supplementary Figure 1:** confocal imaging of a representative human colon section stained with anti-GILZ antibody. White arrows point at goblet cells, yellow arrows point at cells with apico-basal polarity (scale bar 10 $\mu$ m). Nuclei were counterstained with DAPI.
