# Supplementary material
Source: Research Square preprint supplement (doi:10.21203/rs.3.rs-7590228/v1)
Supplement: Supplementary file 4 [file 3a278ce9c0f0e285abc12539.pdf]

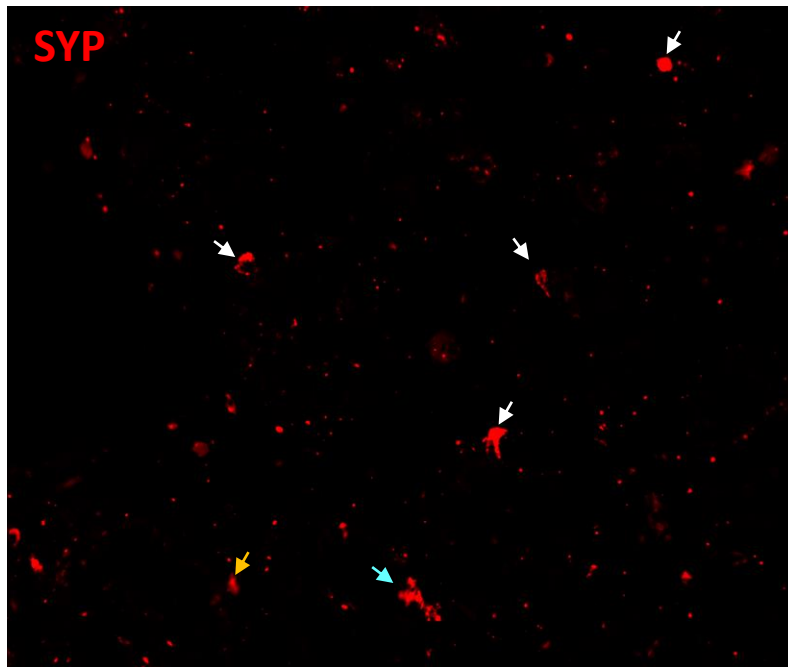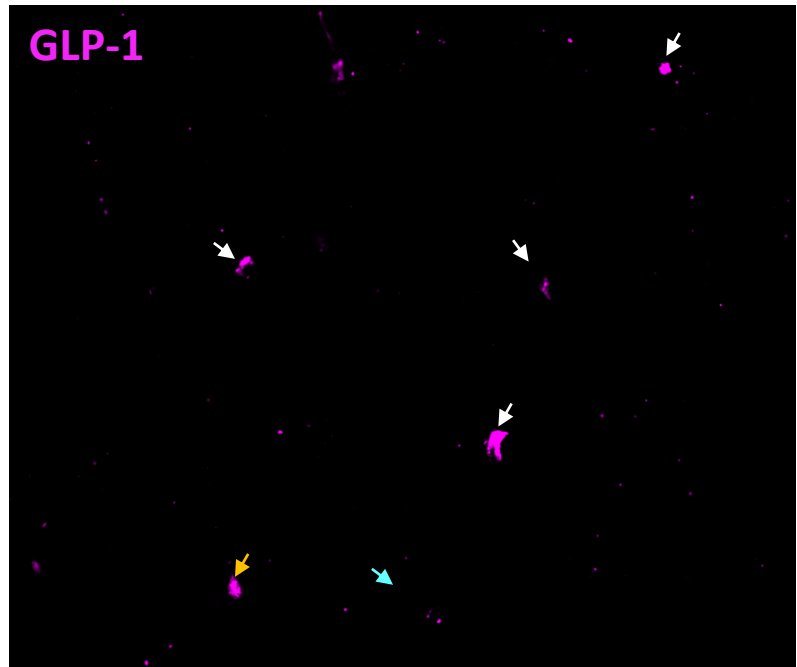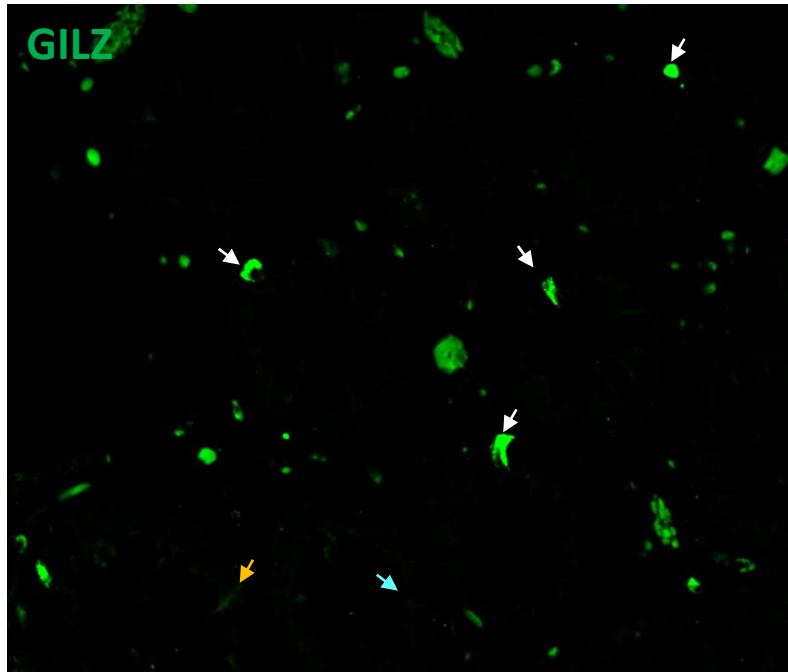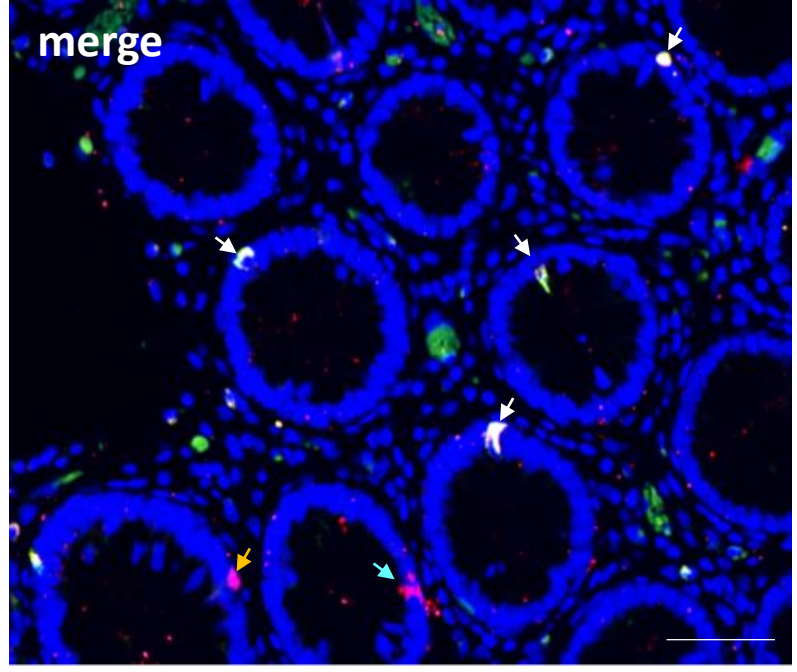

**Supplementary Figure 3:** representative confocal image of a colon section from a healthy individual. All cells identified by arrows are SYP<sup>+</sup>. Light blue arrows indicate GILZ<sup>-</sup>/GLP-1<sup>-</sup> cells, whereas yellow arrows point at GILZ<sup>-</sup>/GLP-1<sup>+</sup> cells. Nuclei were counterstained with DAPI. Scale bar: 50μm.
