# Supplementary material
Source: Research Square preprint supplement (doi:10.21203/rs.3.rs-7590228/v1)
Supplement: Supplementary file 5 [file 4153e005a789eb17a432c375.pdf]

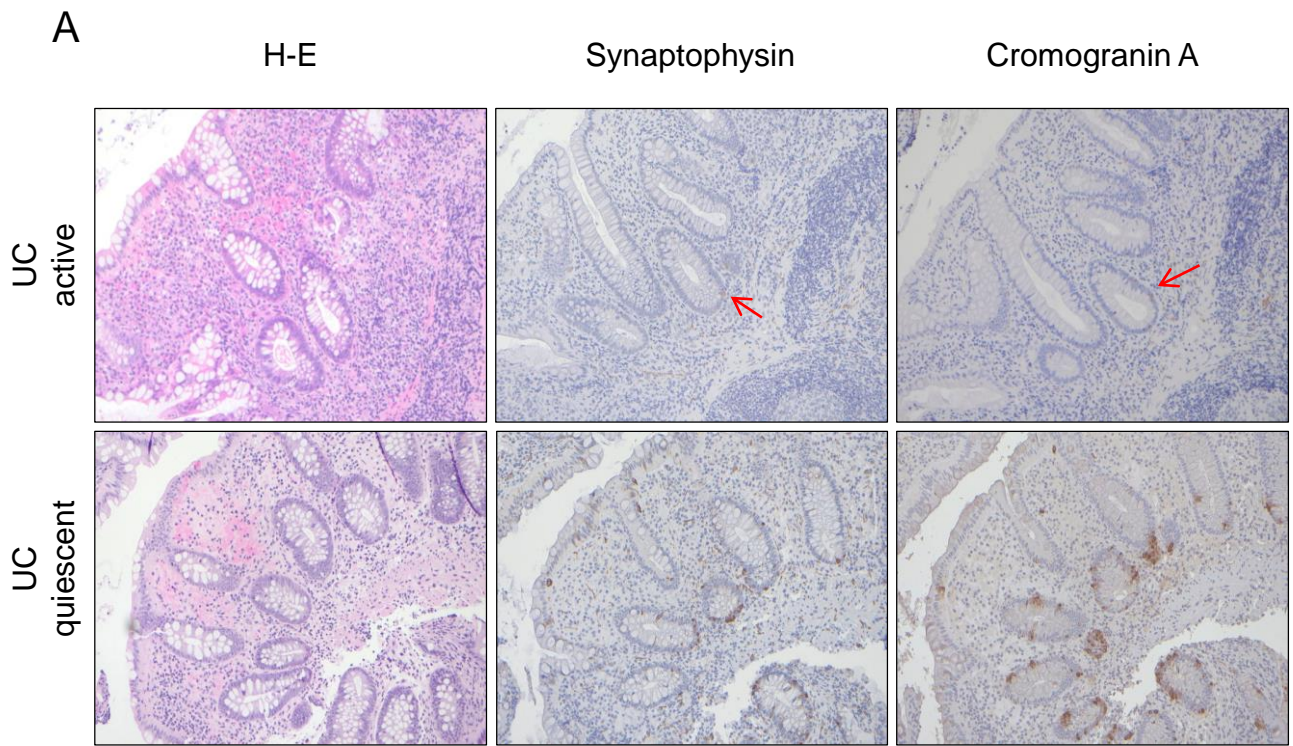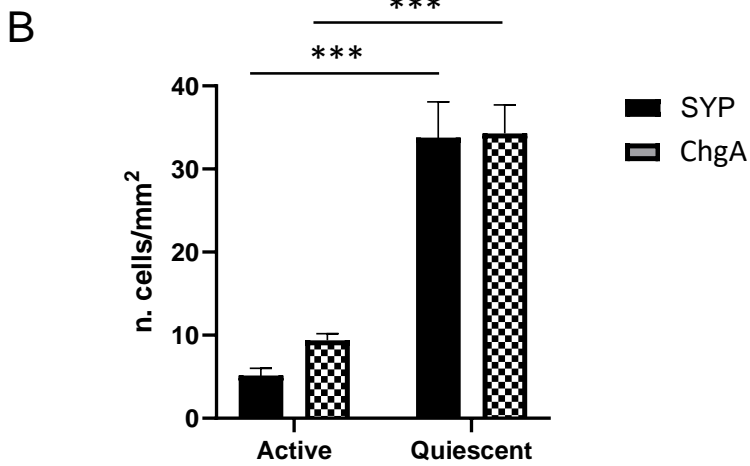

**Supplementary Figure 7:** immunohistochemistry of SYP and ChgA in active and quiescent UC biopsies. A. Representative images of active and quiescent UC, with neutrophil infiltration and cryptitis in the former. Red arrows point at rare SYP<sup>+</sup> and ChgA<sup>+</sup> EEC in active UC. B. Cell counts of SYP<sup>+</sup> and ChgA<sup>+</sup> positive EEC. Values represent the mean  $\pm$  SE. \*\*\*  $p < 0.001$
