# Supplementary material
Source: Research Square preprint supplement (doi:10.21203/rs.3.rs-7590228/v1)
Supplement: Supplementary file 6 [file 57b304373673368fa948a41a.pdf]

A

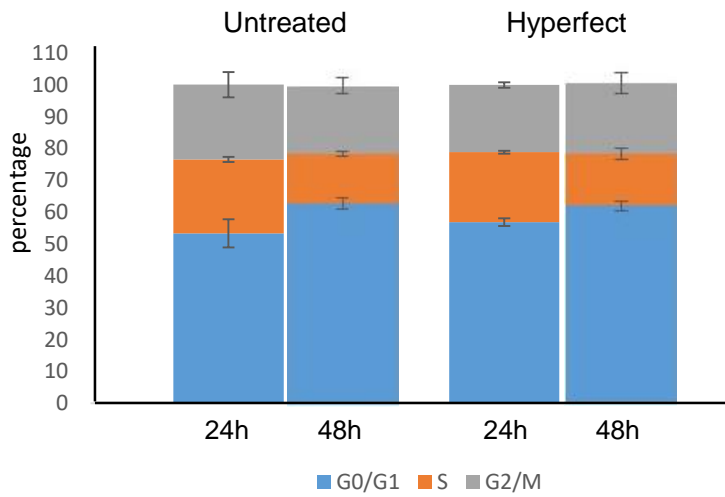

B

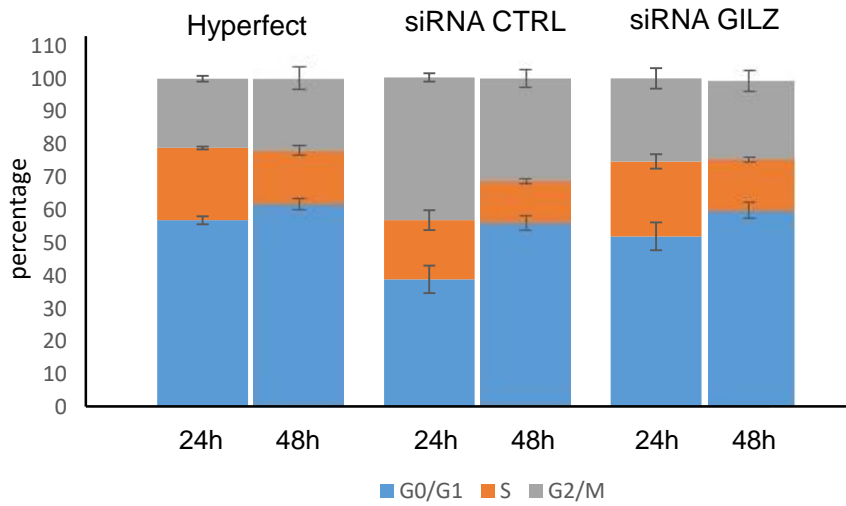

24h

| vs         | Hyperfect | siRNA-CTRL                    | siRNA-GILZ                   |
|------------|-----------|-------------------------------|------------------------------|
| Hyperfect  |           | G0/G1 **<br>S ns<br>G2/M **** | ns                           |
| siRNA-CTRL |           |                               | G0/G1 **<br>S *<br>G2/M **** |

48h

| vs         | Hyperfect | siRNA-CTRL                 | siRNA-GILZ                |
|------------|-----------|----------------------------|---------------------------|
| Hyperfect  |           | G0/G1 *<br>S **<br>G2/M ** | ns                        |
| siRNA-CTRL |           |                            | G0/G1 *<br>S **<br>G2/M * |

C

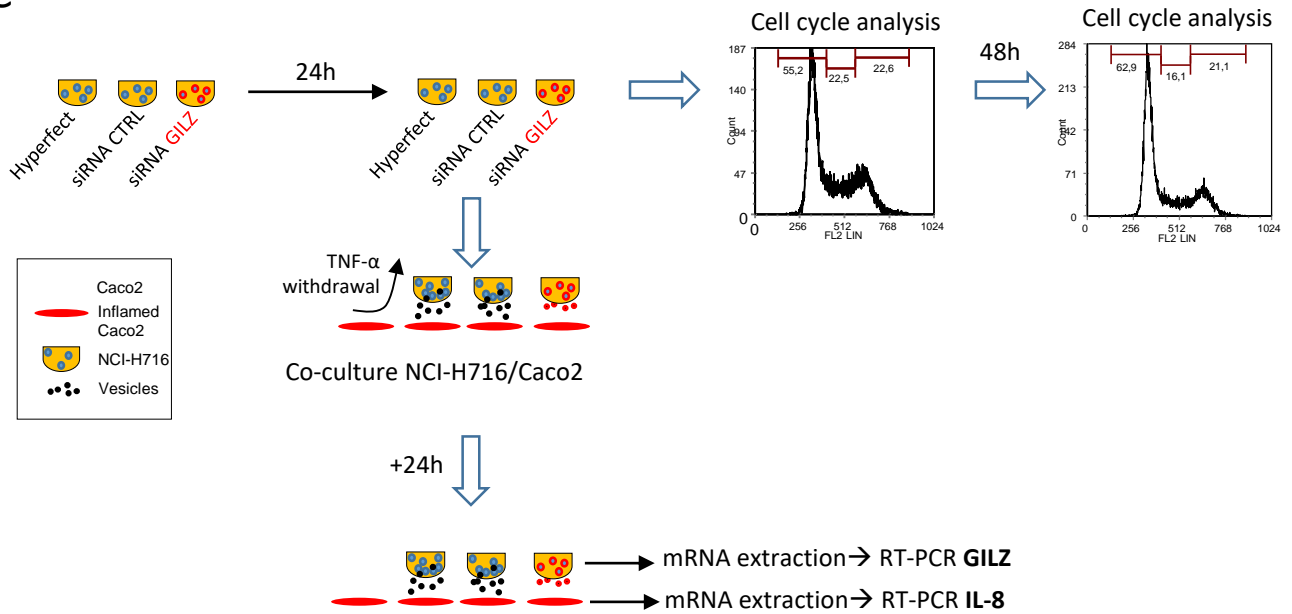

**Supplementary Figure 9:** Cell cycle phases of NCI-H716 cells in silencing experiments. A. Untreated and Hyperfect-treated NCI-H716 cells were analysed after 24 and 48h from silencing. No differences in G0/G1, S and G2/M phases (percentage of total cells) were observed. B. Hyperfect, siRNA CTRL and siRNA GILZ treated cells were analysed after 24 and 48h from silencing. siRNA CTRL displayed a reduced percentage of cells significantly after 24 and 48h in various cell cycle phases. Significance across the groups is reported in the below table for each single phase. C. Schematic description of the silencing experiments
