# Supplementary material
Source: Research Square preprint supplement (doi:10.21203/rs.3.rs-7590228/v1)
Supplement: Supplementary file 7 [file 9c4cd2b95cedc7daa1a1cf97.pdf]

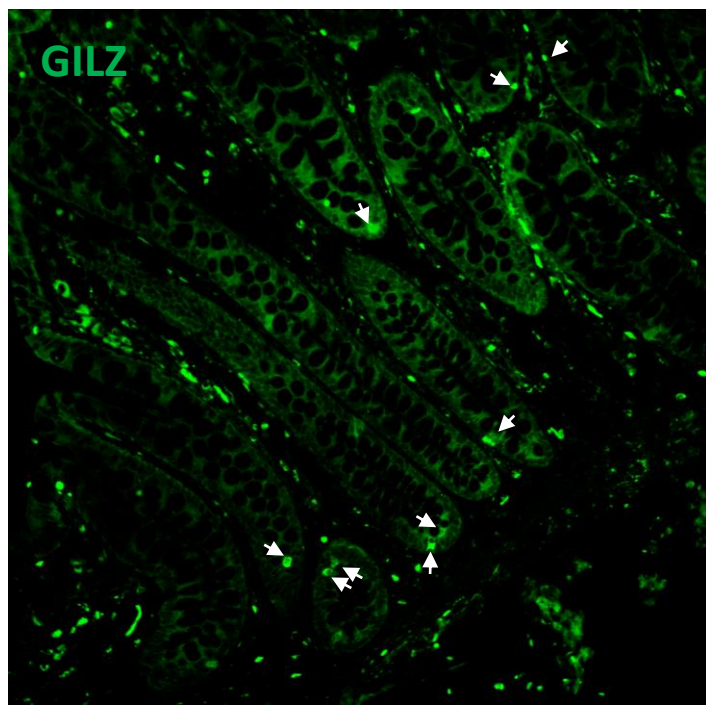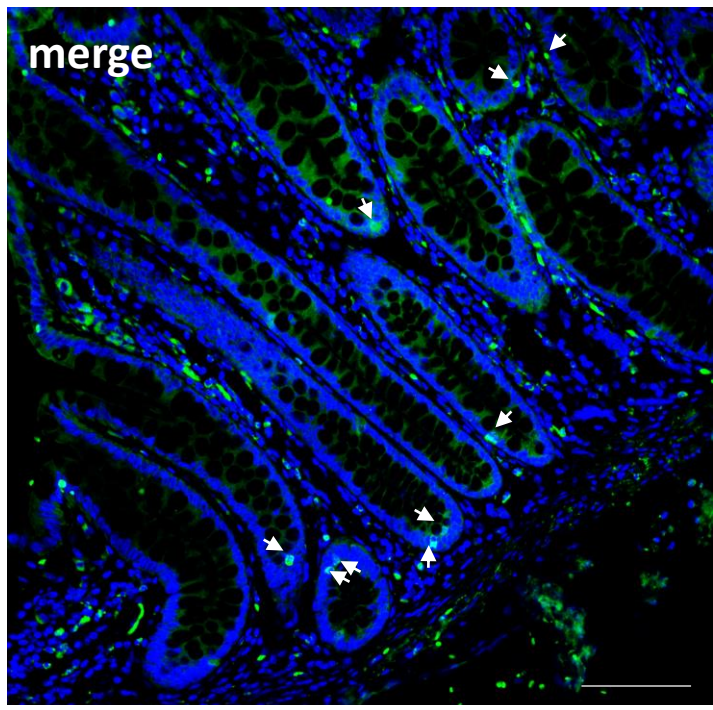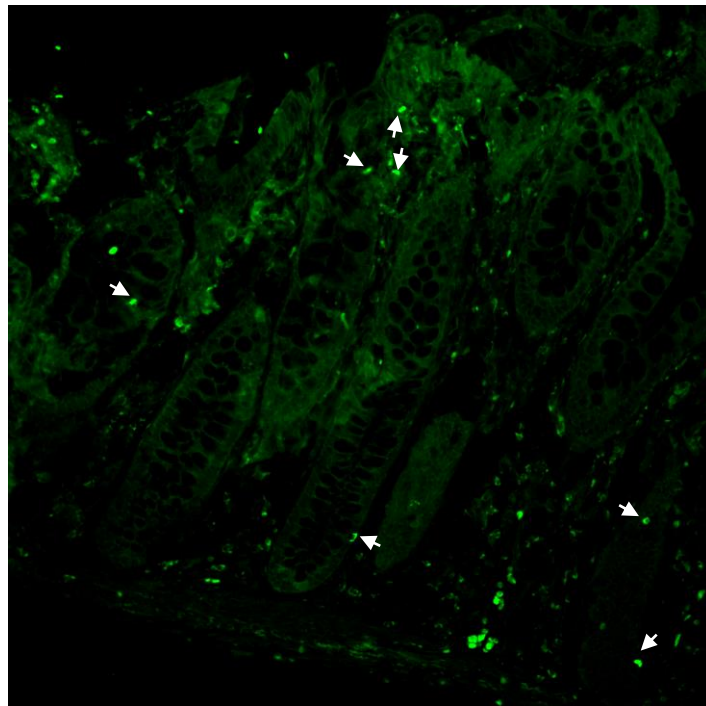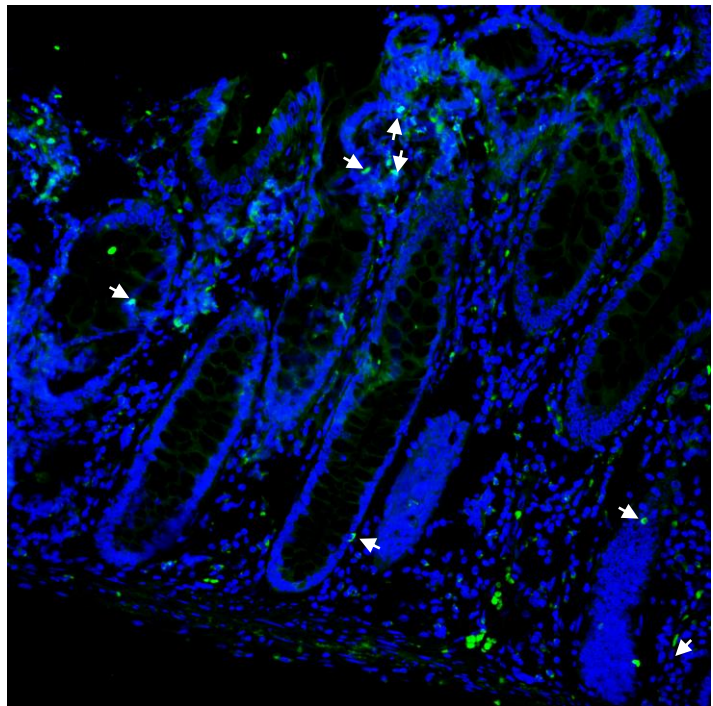

**Supplementary Figure 6.** Two representative fields (top and bottom panels) of GILZ staining (green). The distribution pattern of GILZ spans from the basal to the apical part of the crypt. Nuclei were counterstained with DAPI. Scale bar: 100  $\mu$ m.
