# Supplementary material
Source: Research Square preprint supplement (doi:10.21203/rs.3.rs-7590228/v1)
Supplement: Supplementary file 8 [file b81c0ecf5d7bea4e7d184083.pdf]

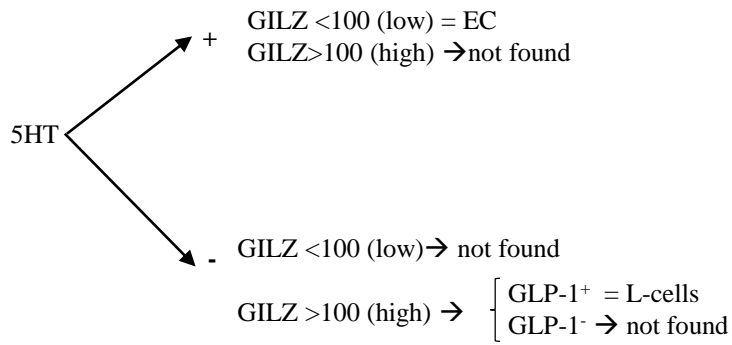

**Supplementary Figure 11.** A schematic diagram describing the criteria used to identify  $\text{GILZ}^{\text{low}}$  and  $\text{GILZ}^{\text{high}}$  expressing cells: ImageJ was used to quantify the fluorescence intensity of each cell analysed. Values below 100 identified  $\text{GILZ}^{\text{low}}$  cells, whereas values above 100 identified  $\text{GILZ}^{\text{high}}$  cells.  $\text{GILZ}^{\text{low}}$  cells expressed only 5HT, whereas  $\text{GILZ}^{\text{high}}$  cells expressed only GLP-1.
