# Supplementary material
Source: Research Square preprint supplement (doi:10.21203/rs.3.rs-7590228/v1)
Supplement: Supplementary file 9 [file ce0c302e308d9f78ed6d4774.pdf]

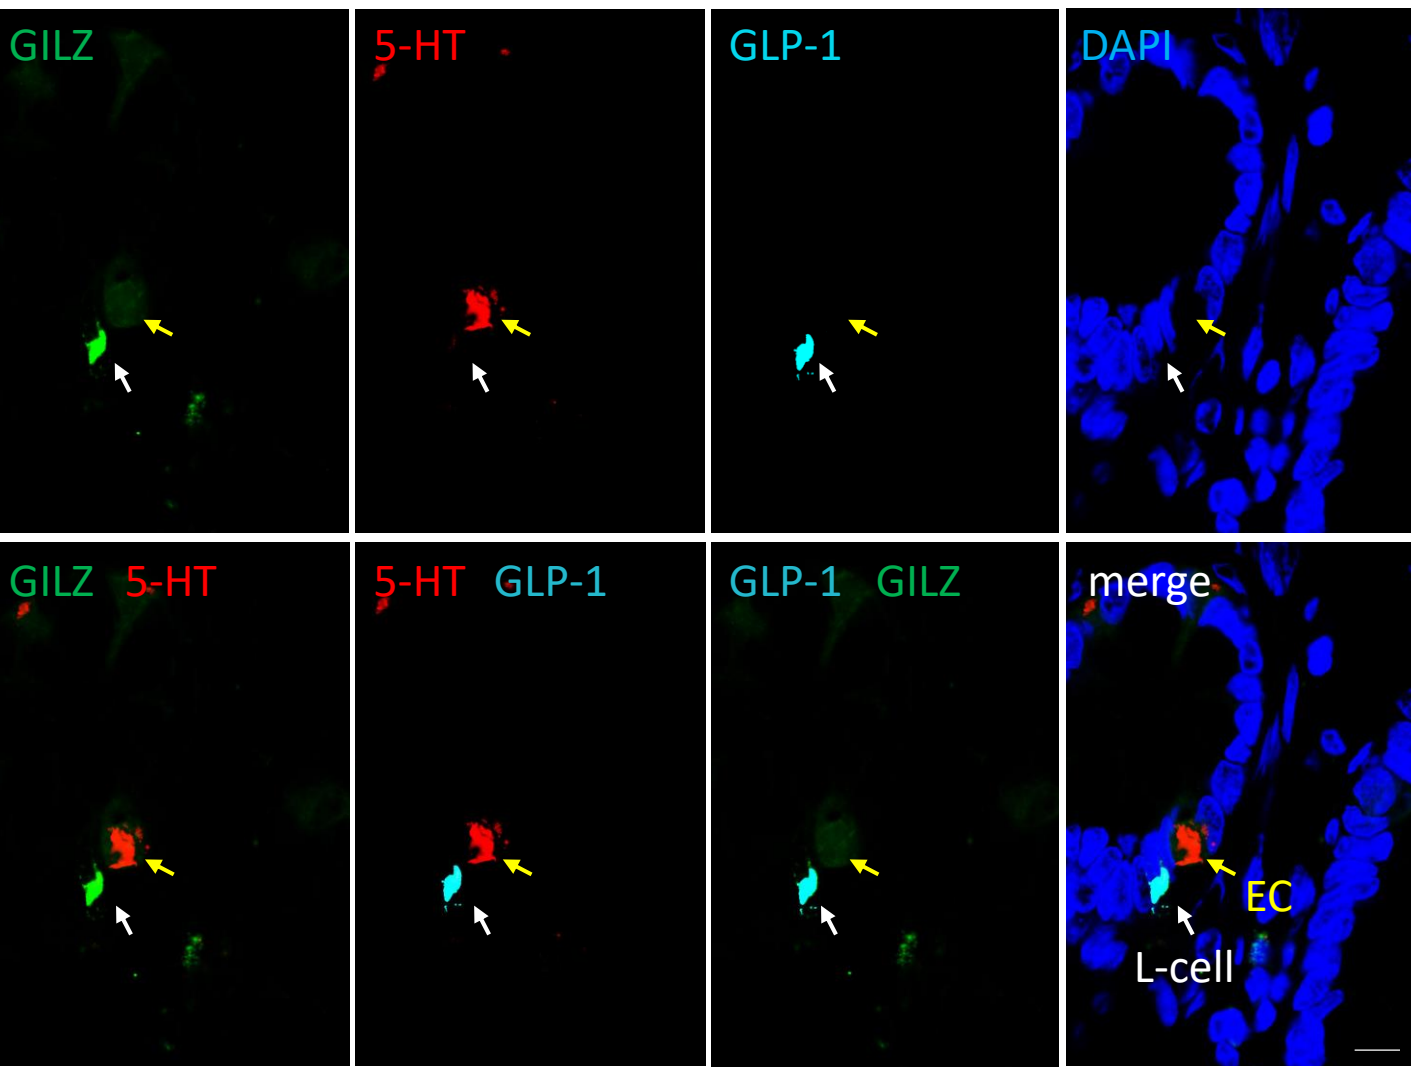

**Supplementary Figure 4:** Representative image of a human colon section: triple staining with Ab anti-GILZ (green), anti-GLP-1 (light blue), and anti-5-HT (red). The white arrowhead points at a L-cell GLP-1<sup>+</sup>, whereas the yellow arrowhead points at an enterochromaffin cell (EC) 5-HT<sup>+</sup>. Nuclei were counterstained with DAPI. Scale bar: 10 $\mu$ m.
