# Supplementary material
Source: Research Square preprint supplement (doi:10.21203/rs.3.rs-7590228/v1)
Supplement: Supplementary file 10 [file d521327d8c42d1a7914f9f01.pdf]

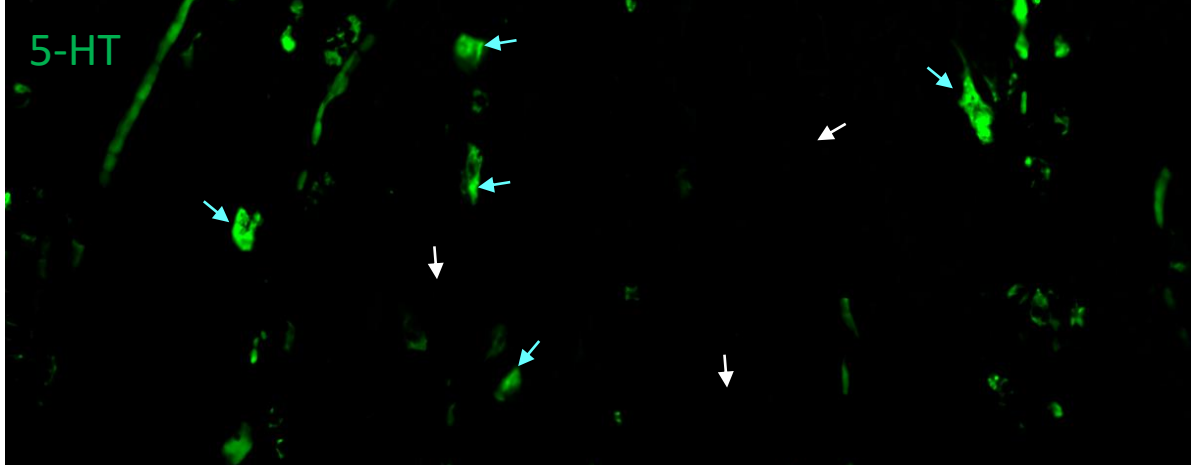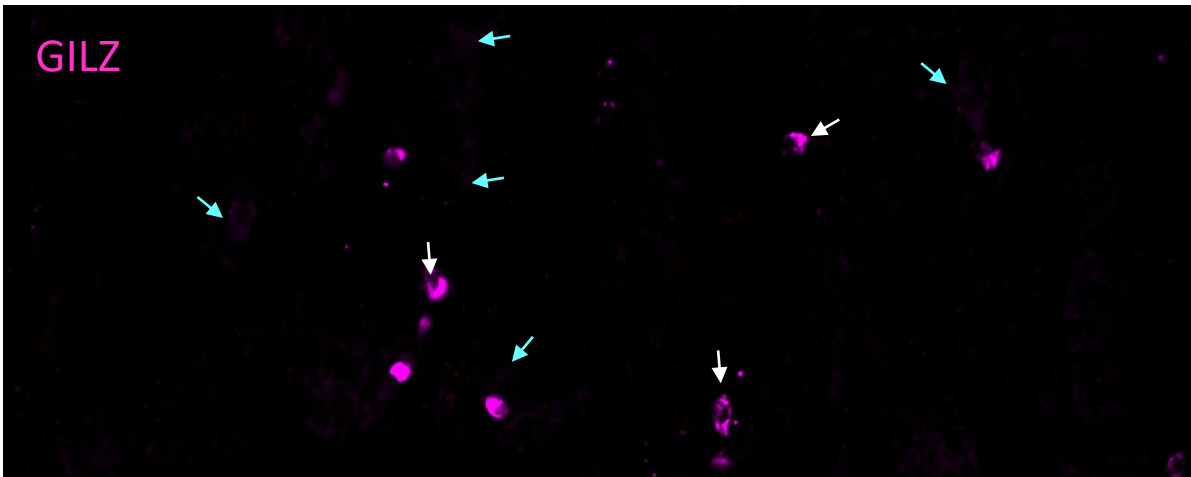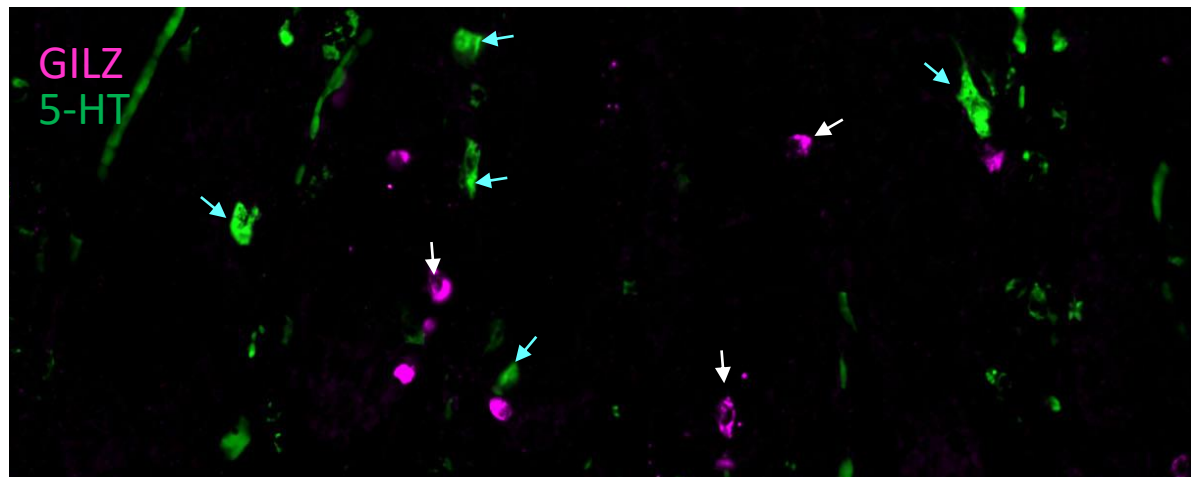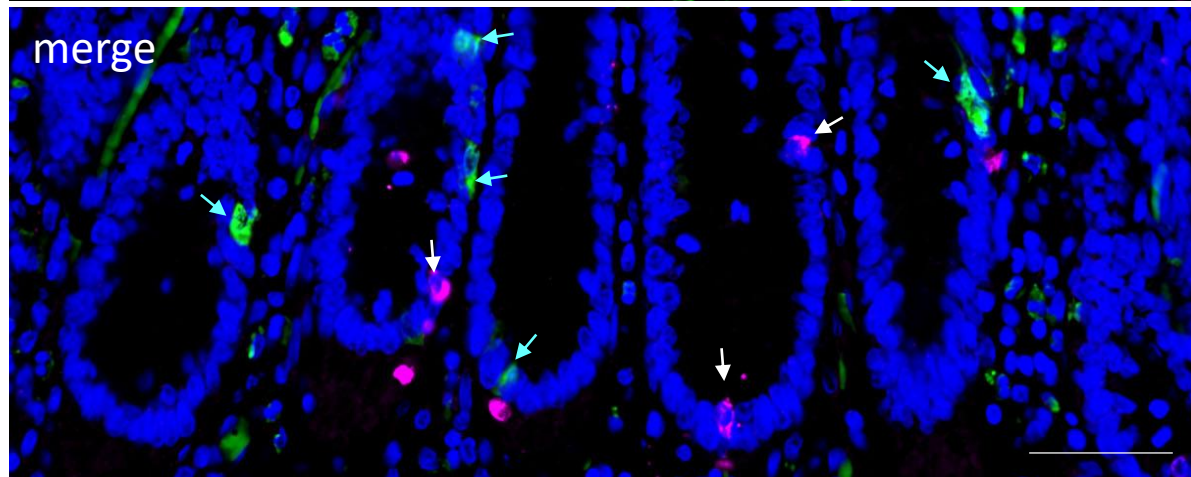

**Supplementary Figure 2:** confocal image of a colon section stained with anti-GILZ (pink) and anti-5HT (green) Abs. Light blue arrows point at GILZ<sup>low</sup>/5-HT<sup>+</sup> cells, whereas white arrows indicate GILZ<sup>high</sup>/5-HT<sup>-</sup>. Nuclei were stained with DAPI. Scale bar: 50µm.
