# Supplementary material
Source: Research Square preprint supplement (doi:10.21203/rs.3.rs-7590228/v1)
Supplement: Supplementary file 11 [file e32f9416d1063bfcabe94c03.pdf]

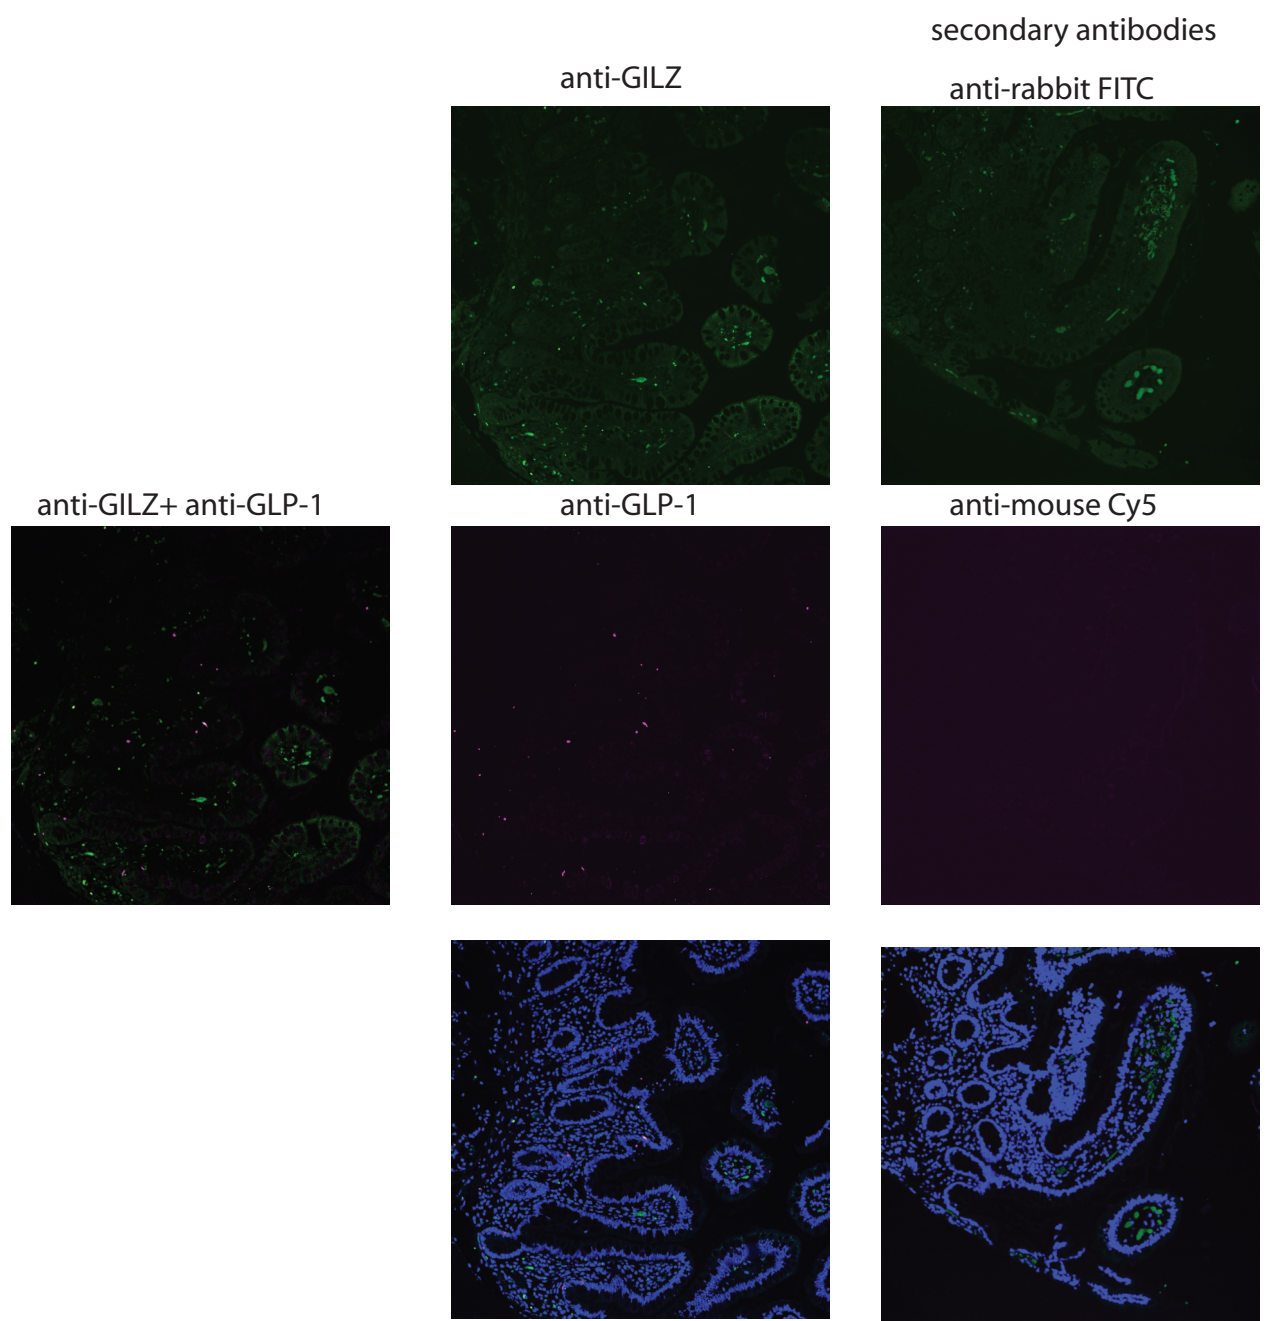

**Supplementary Figure 10:** confocal images of secondary antibodies in healthy colon tissue sections (right microphotographs). GILZ (green) and GLP-1 (pink) co-stained sections are shown in the left and middle columns. Aspecific immunofluorescence can be observed only in the green channel.
